# Supplementary material for: The Interplay of Adipokines, Body Composition and Glucose Homeostasis in Pregnant Women with a History of RYGB Operation
Source: MDPI journal article supplement (doi:10.3390/nu15112498), 2023-05-27
Supplement: s1 [file s1]

# ***The interplay of adipokines, body composition and glucose homeostasis in pregnant women with a history of RYGB operation***

**Luise Bellach MD <sup>1</sup>, Liliana-Imi Gard <sup>1</sup>, Simon D. Lindner MSc <sup>2,3</sup>, Sabina Baumgartner-Parzer PhD <sup>1</sup>, Peter Klimek PhD <sup>2,3</sup>, Alexandra Kautzky-Willer MD <sup>1</sup>, Michael Leutner MD <sup>1</sup>**

**Corresponding: Michael Leutner MD <sup>1</sup>**

## **Affiliation:**

<sup>1</sup> Clinical Division of Endocrinology and Metabolism, Department of Internal Medicine III, Medical University of Vienna, Austria, Spitalgasse 23, A-1090 Vienna, Austria

<sup>2</sup> Section for Science of Complex Systems, CeMSIIS, Medical University of Vienna, Spitalgasse 23, A-1090 Vienna, Austria

<sup>3</sup> Complexity Science Hub Vienna, Josefstädter Strasse 39, A-1080 Vienna, Austria

## ***Supplementary materials***

### **Table of contents**

|                                                                             |   |
|-----------------------------------------------------------------------------|---|
| Table S1: Differences between adipokines during pregnancy .....             | 2 |
| Figure S1: Violin-dot-plot for the comparisons in Figure 1 / Table S1 ..... | 2 |
| Table S2: Differences between adipokines postpartum .....                   | 3 |
| Figure S2: Violin-dot-plot for the comparisons in Figure 2 / Table S2 ..... | 3 |
| Table S3: Longitudinal changes of adipokines (pregnancy vs. postpartum..... | 4 |

Table S1: Differences between adipokines during pregnancy

|                      | RYGB (N=25)                         | obesity (N=19)                       | NW (N=19)                           | p-value              | Adj. p value         |
|----------------------|-------------------------------------|--------------------------------------|-------------------------------------|----------------------|----------------------|
| Leptin [ng/ml]       |                                     |                                      |                                     |                      |                      |
| n                    | 21                                  | 18                                   | 19                                  | < 0.001 <sup>1</sup> | < 0.001 <sup>1</sup> |
| Mean (SD)            | 17.74 (10.08) <sup>b</sup>          | 31.28 (8.86) <sup>b f</sup>          | 19.14 (5.90) <sup>f</sup>           |                      |                      |
| Adiponectin [μg/ml]  |                                     |                                      |                                     |                      |                      |
| n                    | 21                                  | 18                                   | 19                                  | < 0.001 <sup>2</sup> | < 0.001 <sup>2</sup> |
| Mean (range)         | 9.33 (3.85 – 20.42) <sup>b</sup>    | 4.27 (1.87 – 8.30) <sup>b f</sup>    | 8.71 (4.78 – 17.62) <sup>f</sup>    |                      |                      |
| AFABP [ng/ml]        |                                     |                                      |                                     |                      |                      |
| n                    | 21                                  | 18                                   | 19                                  | < 0.001 <sup>2</sup> | < 0.001 <sup>2</sup> |
| Mean (range)         | 11,19 <sup>b c</sup> (6,43 - 24,55) | 28,91 <sup>b f</sup> (15,96 - 46,56) | 14,13 <sup>c f</sup> (6,61 - 25,29) |                      |                      |
| FGF21 [pg/ml]        |                                     |                                      |                                     |                      |                      |
| n                    | 21                                  | 18                                   | 17                                  | 0.27 <sup>2</sup>    | 0.27 <sup>2</sup>    |
| Mean (range)         | 4.88 (1.35)                         | 5.28 (1.05)                          | 4.62 (1.15)                         |                      |                      |
| Afamin [μg/ml]       |                                     |                                      |                                     |                      |                      |
| n                    | 21                                  | 18                                   | 19                                  | 0.03 <sup>2</sup>    | 0.20 <sup>2</sup>    |
| Mean (range)         | 77.98 (60.53 - 112.72) <sup>c</sup> | 90.16 (75.16 - 110.66)               | 88.72 (63.39 - 138.04) <sup>c</sup> |                      |                      |
| Secretagogin [pg/ml] |                                     |                                      |                                     |                      |                      |
| n                    | 21                                  | 15                                   | 19                                  | 0.42 <sup>2</sup>    | 1 <sup>2</sup>       |
| Mean (range)         | 162.55 (25.88 - 4265.8)             | 234.42 (33.42 - 1172.2)              | 267.3 (12.91 - 1458.81)             |                      |                      |

Table S 1: Comparison of adipokines between pregnant women with a history of RYGB, women with obesity and normal-weight controls. RYGB = Roux-En-Y gastric bypass, NW = normal weight, AFABP = adipocyte fatty acid binding protein, FGF21 = fibroblast growth factor 21, a = p-value < 0.05 between RYGB and women with obesity, b = p-value < 0.01 between RYGB and women with obesity, c = p-value < 0.05 between RYGB and normal-weight women, d = p-value < 0.01 between RYGB and normal-weight women; e = p-value < 0.05 between women with obesity and normal-weight women, f = p-value < 0.01 between women with obesity and normal-weight women, 1 = ANOVA, 2 = ANOVA (after log10 transformation)

Figure S1: Violin-dot-plot for the comparisons in Figure 1 / Table S1

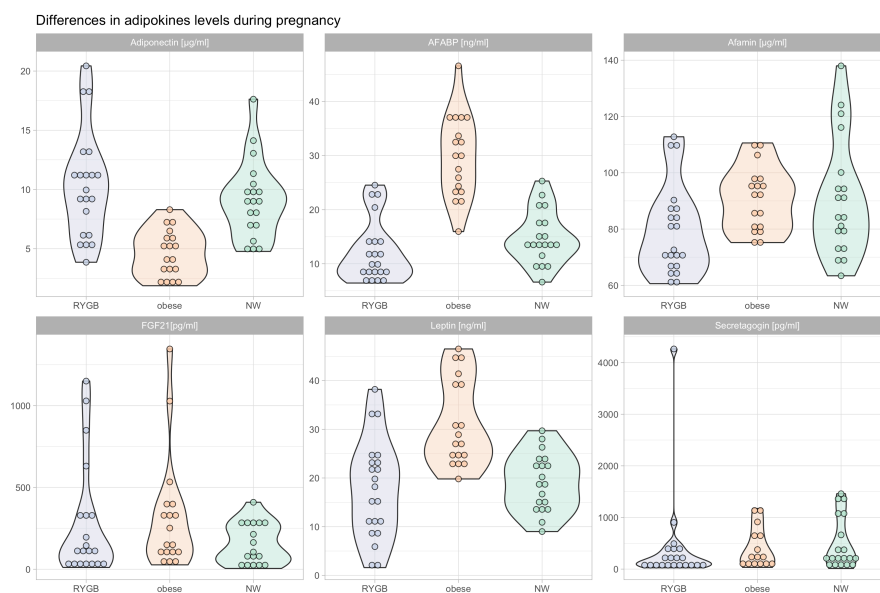

Figure S 1: Violin-dot-plot for the adipokines and group comparisons of Figure 1 and Table S1

Table S2: Differences between adipokines postpartum

|                | RYGB (N=25)                | obesity (N=19)               | NW (N=19)                 | p value              | Adj. p value        |
|----------------|----------------------------|------------------------------|---------------------------|----------------------|---------------------|
| Leptin [ng/ml] |                            |                              |                           |                      |                     |
| n              | 12                         | 9                            | 14                        | < 0.001 <sup>1</sup> | < 0.01 <sup>1</sup> |
| Mean (SD)      | 15.32 (10.11) <sup>b</sup> | 32.52 (10.57) <sup>b f</sup> | 14.36 (8.59) <sup>f</sup> |                      |                     |
| AFABP [ng/ml]  |                            |                              |                           |                      |                     |
| n              | 13                         | 9                            | 14                        | 0.014 <sup>2</sup>   | 0.24 <sup>2</sup>   |
| Mean (SD)      | 2.76 (0.54) <sup>a c</sup> | 3.38 (0.36) <sup>a</sup>     | 3.15 (0.47) <sup>c</sup>  |                      |                     |
| FGF21 [pg/ml]  |                            |                              |                           |                      |                     |
| n              | 13                         | 9                            | 5                         | 0.589 <sup>2</sup>   | 1 <sup>2</sup>      |
| Mean (SD)      | 5.06 (1.60)                | 4.69 (0.99)                  | 5.20 (0.65)               |                      |                     |

Table S 2: Comparison of adipokines between post-partum women with a history of RYGB, women with obesity and normal-weight controls. RYGB = Roux-En-Y gastric bypass, NW = normal weight, AFABP = adipocyte fatty acid binding protein, FGF21 = fibroblast growth factor 21, a = p-value < 0.05 between RYGB and women with obesity, b = p-value < 0.01 between RYGB and women with obesity, c = p-value < 0.05 between RYGB and normal-weight women, d = p-value < 0.01 between RYGB and normal-weight women; e = p-value < 0.05 between women with obesity and normal-weight women, f = p-value < 0.01 between women with obesity and normal-weight women, 1 = ANOVA, 2 = ANOVA (after log10 correction)

Figure S2: Violin-dot-plot for the comparisons in Figure 2 / Table S2

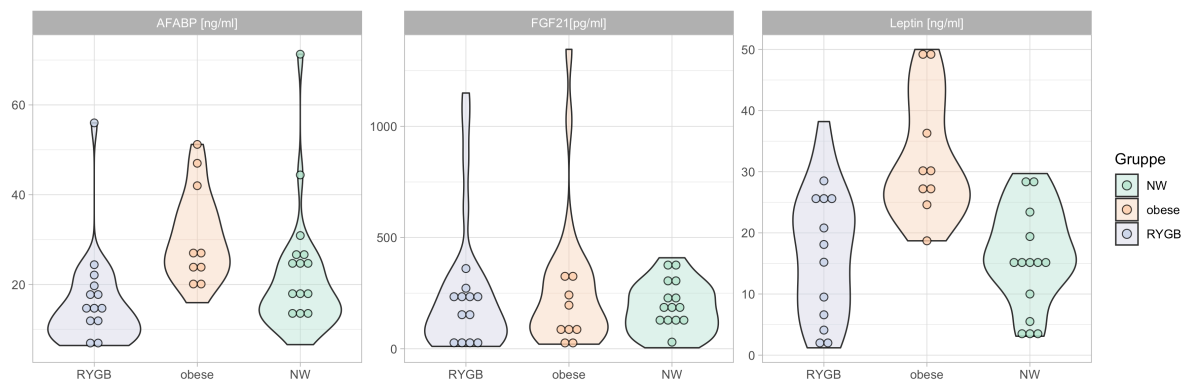

Figure S 2: Violin-dot-plot for the adipokines and group comparisons of Figure 1 and Table S1

Table S3: Longitudinal changes of adipokines (pregnancy vs. postpartum)

|                | gestational              | post-partum              | p-value            | Adj. p value       |
|----------------|--------------------------|--------------------------|--------------------|--------------------|
| RYGB           |                          |                          |                    |                    |
| Leptin [ng/ml] |                          |                          |                    |                    |
| n              | 21                       | 12                       | 0.57 <sup>1</sup>  | 1 <sup>1</sup>     |
| Mean (SD)      | 17.74 (10.08)            | 15.32 (10.11)            |                    |                    |
| AFABP [ng/ml]  |                          |                          |                    |                    |
| n              | 21                       | 13                       | 0.32 <sup>2</sup>  | 1 <sup>2</sup>     |
| Mean (range)   | 11.19 (6.43 - 24.55)     | 15.85 (6.4 - 55.98)      |                    |                    |
| FGF21 [pg/ml]  |                          |                          |                    |                    |
| n              | 20                       | 13                       | 0.63 <sup>2</sup>  | 1 <sup>2</sup>     |
| Mean (range)   | 131.22 (10.69 - 1150.8)  | 157.04 (20.18 - 9354.06) |                    |                    |
| obesity        |                          |                          |                    |                    |
| Leptin [ng/ml] |                          |                          |                    |                    |
| n              | 18                       | 9                        | 0.32 <sup>1</sup>  | 1 <sup>1</sup>     |
| Mean (SD)      | 31.28 (8.86)             | 32.52 (10.57)            |                    |                    |
| AFABP [ng/ml]  |                          |                          |                    |                    |
| n              | 18                       | 9                        | 0.92 <sup>2</sup>  | 0.92 <sup>2</sup>  |
| Mean (SD)      | 28.91 (15.96 - 46.56)    | 29.51 (19.19 - 51.17)    |                    |                    |
| FGF21 [pg/ml]  |                          |                          |                    |                    |
| n              | 18                       | 9                        | 0.03 <sup>2</sup>  | 0.28 <sup>2</sup>  |
| Mean (SD)      | 196.34 (26.73 - 1345.86) | 108.89 (20.7 - 334.97)   |                    |                    |
| NW             |                          |                          |                    |                    |
| Leptin [ng/ml] |                          |                          |                    |                    |
| n              | 19                       | 14                       | 0.02 <sup>1</sup>  | 0.22 <sup>1</sup>  |
| Mean (SD)      | 19.14 (5.90)             | 14.36 (8.59)             |                    |                    |
| AFABP [ng/ml]  |                          |                          |                    |                    |
| n              | 19                       | 14                       | 0.002 <sup>2</sup> | 0.024 <sup>2</sup> |
| Mean (SD)      | 14.13 (6.61 - 25.29)     | 23.39 (13.21 - 71.29)    |                    |                    |
| FGF21 [pg/ml]  |                          |                          |                    |                    |
| n              | 17                       | 14                       | 0.03 <sup>2</sup>  | 0.28 <sup>2</sup>  |
| Mean (SD)      | 101.62 (4.7 - 409.26)    | 180.3 (29.99 - 396.28)   |                    |                    |

Table S 3: Comparison of adipokines between gestational versus post-partal period in women with a history of RYGB, women with obesity and normal-weight controls. RYGB = Roux-En-Y gastric bypass, NW = normal weight, AFABP = adipocyte fatty acid binding protein, FGF21 = fibroblast growth factor 21, 1 = Student's paired t test, 2 = Student's paired t test (after log10 transformation)
